# Supplementary material
Source: publisher figshare collection journal article supplement (https://sage.figshare.com/ndownloader/files/31134007)
Supplement: Supplementary file 1 [file 31134007]

Consolidated criteria for reporting qualitative studies (COREQ): 32-item checklist

| **Domain 1: Research team and reflexivity** | |
| --- | --- |
| **Personal Characteristics** | |
| 1. Interviewer/facilitator Which author/s conducted the interview or focus group? | p. 5 |
| 2. Credentials What were the researcher’s credentials? E.g. PhD, MD | p. 5 |
| 3. Occupation What was their occupation at the time of the study? | p. 5 |
| 4. Gender Was the researcher male or female? | p. 5 |
| 5. Experience and training What experience or training did the researcher have? | p. 5 |
| **Relationship with participants** | |
| 6. Relationship established Was a relationship established prior to study commencement? | p. 5 |
| 7. Participant knowledge of the interviewer. What did the participants know about the researcher? e.g. personal goals, reasons for doing the research | N/A |
| 8. Interviewer characteristics What characteristics were reported about the interviewer/facilitator? e.g. Bias, assumptions, reasons and interests in the research topic | N/A |
| **Domain 2: study design** | |
| **Theoretical framework** | |
| 9. Methodological orientation and Theory, What methodological orientation was stated to underpin the study? e.g. grounded theory, discourse analysis, ethnography, phenomenology, content analysis | p. 3-4 |
| **Participant selection** | |
| 10. Sampling How were participants selected? e.g. purposive, convenience, consecutive, snowball | p. 4 |
| 11. Method of approach How were participants approached? e.g. face-to-face, telephone, mail, email | p. 4 |
| 12. Sample size How many participants were in the study? | p. 4 |
| 13. Non-participation How many people refused to participate or dropped out? Reasons? | p. 4 |
| **Setting** | |
| 14. Setting of data collection Where was the data collected? e.g. home, clinic, workplace | p. 5 |
| 15. Presence of non-participants Was anyone else present besides the participants and researchers? | p. 5 |
| 16. Description of sample What are the important characteristics of the sample? e.g. demographic data, date | p. 5 |
| **Data collection** | |
| 17. Interview guide Were questions, prompts, guides provided by the authors? Was it pilot tested? | p. 5 |
| 18. Repeat interviews Were repeat interviews carried out? If yes, how many? | p. 5 |
| 19. Audio/visual recording Did the research use audio or visual recording to collect the data? | p. 5 |
| 20. Field notes Were field notes made during and/or after the interview or focus group? | N/A |
| 21. Duration What was the duration of the interviews or focus group? | p. 5 |
| 22. Data saturation Was data saturation discussed? | p. 5 & 17 |
| 23. Transcripts returned Were transcripts returned to participants for comment and/or correction? | p. 17 |
| **Domain 3: analysis and findings** | |
| **Data analysis** | |
| 24. Number of data coders How many data coders coded the data? | p. 6 & 16 |
| 25. Description of the coding tree Did authors provide a description of the coding tree? | N/A |
| 26. Derivation of themes Were themes identified in advance or derived from the data? | p. 4 |
| 27. Software What software, if applicable, was used to manage the data? | N.A. |
| 28. Participant checking Did participants provide feedback on the findings? | p. 17 |
| **Reporting** | |
| 29. Quotations presented Were participant quotations presented to illustrate the themes / findings? Was each quotation identified? e.g. participant number | p. 7-14 |
| 30. Data and findings consistent Was there consistency between the data presented and the findings? | p. 7-14 |
| 31. Clarity of major themes Were major themes clearly presented in the findings? | p. 7-14 |
| 32. Clarity of minor themes Is there a description of diverse cases or discussion of minor themes? | p. 14 - 16 |

Tong A SP, Craig J. Consolidated criteria for reporting qualitative research (COREQ): a 32-item checklist for interviews and focus groups. *International Journal for Quality in Health Care* 2007; 19: 349-357. DOI: <https://doi.org/10.1093/intqhc/mzm042>
